# Supplementary material for: Web-Based Tools for Text-Based Patient-Provider Communication in Chronic Conditions: Scoping Review
Source: PubMed Central journal article supplement (PMC5681721; doi:10.2196/jmir.7987), 2017-10-27
Supplement: jmir_v19i10e366_app1.pdf [file jmir_v19i10e366_app1.pdf]

## Appendix 1 MEDLINE(R) (Ovid Interface) 1946- Week 1 March 2016

- 1 exp internet/
- 2 internet:.mp.
- 3 exp informatics/
- 4 exp computer-assisted instruction/
- 5 online.mp.
- 6 on-line.mp.
- 7 (virtual not virtual realit:).mp.
- 8 world wide web:.mp.
- 9 worldwide web:.mp.
- 10 www.tw.
- 11 web.tw,kw.
- 12 web page:.mp.
- 13 webpage:.mp.
- 14 web site:.mp.
- 15 website:.mp.
- 16 exp computer communication networks/
- 17 (portal? and (internet\* or online or on-line or computer\* or electronic or web or webbased or telehealth or tele-health)).mp.
- 18 (portal?? adj3 patient??).mp,kw.
- 19 ehealth.mp.
- 20 e-health.mp.
- 21 semantic web?.mp.
- 22 blog:.mp.
- 23 folksonom:.mp.
- 24 mashup:.mp.
- 25 pod cast:.mp.
- 26 podcast:.mp.
- 27 (social adj2 bookmark:).mp.
- 28 (social adj2 book-mark:).mp.
- 29 (social adj2 software:).mp.
- 30 (sociable adj2 technolog:).mp.
- 31 (social adj2 technolog:).mp.
- 32 tag cloud:.mp.
- 33 (virtual adj2 collabor:).mp.
- 34 web api:.mp.

35 (web adj2 syndicat:).mp.  
36 webcast:.mp.  
37 web-cast:.mp.  
38 web-log:.mp.  
39 weblog:.mp.  
40 wiki:.mp.  
41 social network:.mp.  
42 (social adj2 utilit:).mp.  
43 chat.mp.  
44 chatroom\*.mp.  
45 chat-room\*.mp.  
46 chat group\*.mp.  
47 chatgroup\*.mp.  
48 chat techno\*.mp.  
49 meebo.mp.  
50 "second life".mp.  
51 secondlife.mp.  
52 uhealth.mp.  
53 (ubiquit\* adj2 comput\*).mp.  
54 "u-comput\*".mp.  
55 patientslikeme\*.mp.  
56 "www.patientslikeme.com".mp.  
57 (digital adj2 divid\*).mp.  
58 (digital adj2 inequit\*).mp.  
59 exp information systems/  
60 exp computer systems/  
61 exp telecommunications/  
62 exp user-computer interface/  
63 exp computer literacy/  
64 exp attitude to computers/  
65 "u-health\*".mp.  
66 "e-health\*".mp.  
67 twitter.mp.  
68 tweet.mp.  
69 epatient\*.mp.  
70 "e-patient\*".mp.  
71 edoctor\*.mp.

72 e-doctor\*.mp.  
73 ephysician\*.mp.  
74 "e-physician\*".mp.  
75 elearn\*.mp.  
76 "e-learn\*".mp.  
77 Webcasts/  
78 Webcasts as topic/  
79 microblog\*.mp.  
80 micro-blog\*.mp.  
81 facebook\*.mp.  
82 Social Media/  
83 Social Networking/  
84 "information and communication technolog\*".mp.  
85 ict.mp.  
86 etechnolog\*.mp.  
87 e-technolog\*.mp.  
88 "health 2.0".mp.  
89 "web 2.0".mp.  
90 "academia.edu".mp.  
91 bebo.mp.  
92 dailystrength\*.mp.  
93 livestrong\*.mp.  
94 epernicus\*.mp.  
95 experienceproject\*.mp.  
96 carepages\*.mp.  
97 caringbridge\*.mp.  
98 flickr\*.mp.  
99 fuelmyblog\*.mp.  
100 friendica\*.mp.  
101 friendster\*.mp.  
102 googleplus\*.mp.  
103 google plus.mp.  
104 hi5.mp.  
105 jaiku\*.mp.  
106 kiwibox\*.mp.  
107 linkedin\*.mp.  
108 myopera\*.mp.

109 myspace\*.mp.  
110 netlog\*.mp.  
111 ning.mp.  
112 "ning.com".mp.  
113 "www.ning.com".mp.  
114 orkut\*.mp.  
115 pinterest\*.mp.  
116 researchgate\*.mp.  
117 sciencestage\*.mp.  
118 sonico.mp.  
119 stumbleupon\*.mp.  
120 twitter\*.mp.  
121 wasabi\*.mp.  
122 "wasabi.com".mp.  
123 wellwer\*.mp.  
124 wooxie\*.mp.  
125 social awareness\*.mp.  
126 "aim pages".mp.  
127 badoo\*.mp.  
128 cyworld\*.mp.  
129 drconnected\*.mp.  
130 icarecafe\*.mp.  
131 sanewire\*.mp.  
132 whoissick\*.mp.  
133 (social adj2 informatic\*).mp.  
134 (social adj2 infomatic\*).mp.  
135 diabetesmine\*.mp.  
136 "diabetesmine.com".mp.  
137 google wave\*.mp.  
138 "windows live".mp.  
139 "live messenger\*".mp.  
140 "aim messenger\*".mp.  
141 "yahoo messenger\*".mp.  
142 "microsoft messenger\*".mp.  
143 compuserv\*.mp.  
144 "america online".mp.  
145 usenet?.mp.

- 146 (mobile adj1 technolog\*).mp.
- 147 (technolog\* adj1 based adj1 intervention\*).mp.
- 148 mcare.tw.
- 149 "m-care".tw.
- 150 "connected care".tw.
- 151 (health\* adj1 inform\* adj1 techn\*).mp.
- 152 Web Browser/
- 153 browser?.mp,kw.
- 154 (touchscreen\* or touch-screen\*).tw,kw.
- 155 (web-bas\* or webbas\*).mp,kw.
- 156 Interactive Health Communication.mp.
- 157 internet communication tool.mp.
- 158 internet communication.mp.  
(telemedicine/ or remote consultation/) not teledermatology.mp. not teleradiology.mp. not telepathology.mp. [mp=title, abstract, original title, name of substance word, subject heading word, keyword heading word, protocol supplementary concept word, rare disease supplementary concept word, unique identifier]
- 159 or/1-159 [MEDLINE Internet Hedge]
- 161 Chronic Disease/
- 162 (chronic\* adj2 ill\*).mp,kw.
- 163 (chronic\* adj2 disease\*).mp,kw.
- 164 (chronic\* adj2 disease\*).mp,kw.
- 165 polypatholog\*.mp,kw.
- 166 poly-patholog\*.mp,kw.
- 167 multiple comorbid\*.mp,kw.
- 168 multiple co-morbid\*.mp,kw.
- 169 (chronic adj2 patholog\*).mp,kw.
- 170 pluri-patholog\*.mp,kw.
- 171 pluripatholog\*.mp,kw.
- 172 multiple longterm condition?.mp,kw.
- 173 multiple long-term condition?.mp,kw.
- 174 multiple chronic condition?.mp,kw.
- 175 (multi-morbid\* adj2 condition?).mp,kw.
- 176 (chronic\* adj2 condition?).mp,kw.
- 177 Comorbidity/
- 178 (long term adj2 condition?).mp,kw.
- 179 (longterm adj2 condition?).mp,kw.

180 (chronic adj2 medical adj2 problem\*).mp,kw.  
181 multimorbid\*.mp,kw.  
182 (multi-component? adj2 chronic).mp,kw.  
183 (multicomponent? adj2 chronic).mp,kw.  
184 comorbid\*.mp,kw.  
185 co-morbid\*.mp,kw.  
186 multimorbid\*.mp,kw.  
187 multi-morbid\*.mp,kw.  
188 (complex\* adj3 condition?).mp,kw.  
189 (complex adj2 care?).mp,kw.  
190 or/161-189 [Chronic Illness or Polypathology or Multiple Morbidity]  
191 exp program evaluation/  
192 exp program development/  
193 exp pilot project/  
194 ((patient?? or inpatient?? or outpatient??) adj1 portal?).mp,kw.  
195 platform?.mp,kw.  
196 tool?.mp,kw.  
197 toolkit??.mp,kw.  
198 intervention studies/  
199 intervention?.mp,kw.  
200 prototype?.mp,kw.  
201 kiosk??.mp,kw.  
202 project?.mp,kw.  
203 ((patient? or inpatient? or outpatient?) adj2 program?).mp,kw.  
204 ((patient? or inpatient? or outpatient?) adj2 programme?).mp,kw.  
205 professional-patient relations/  
206 or/191-205 [Intervention or Portal or Tool and related terms]  
207 160 and 190 and 206 [Internet and Chronic Illness and Intervention Hedges]  
208 limit 207 to (english language and humans)  
209 remove duplicates from 208
