# Supplementary material for: Web-Based Tools for Text-Based Patient-Provider Communication in Chronic Conditions: Scoping Review
Source: PubMed Central journal article supplement (PMC5681721; doi:10.2196/jmir.7987), 2017-10-27
Supplement: jmir_v19i10e366_app2.pdf [file jmir_v19i10e366_app2.pdf]

## Appendix 2 EMBASE (Ovid Interface) 1946- Week 1 March 2016

- 1 internet:.mp.
- 2 online.mp.
- 3 on-line.mp.
- 4 (virtual not virtual realit:).mp.
- 5 world wide web:.mp.
- 6 worldwide web:.mp.
- 7 www.tw.
- 8 web.tw,kw.
- 9 web page:.mp.
- 10 webpage:.mp.
- 11 web site:.mp.
- 12 website:.mp.
- 13 (portal? and (internet\* or online or on-line or computer\* or electronic or web or webbased or telehealth or tele-health)).mp. [added March 17 2015]
- 14 (portal?? adj3 patient??).mp,kw. [added March 17b 2015]
- 15 ehealth.mp.
- 16 e-health.mp.
- 17 semantic web?.mp.
- 18 blog:.mp.
- 19 folksonom:.mp.
- 20 mashup:.mp.
- 21 (social adj2 bookmark:).mp.
- 22 (social adj2 book-mark:).mp.
- 23 (social adj2 software:).mp.
- 24 (sociable adj2 technolog:).mp.
- 25 (social adj2 technolog:).mp.
- 26 tag cloud:.mp.
- 27 (virtual adj2 collabor:).mp.
- 28 web api:.mp.
- 29 (web adj2 syndicat:).mp.
- 30 webcast:.mp.
- 31 web-cast:.mp.
- 32 web-log:.mp.
- 33 weblog:.mp.
- 34 wiki:.mp.
- 35 social network:.mp.

36 (social adj2 utilit:).mp.  
37 chat.mp.  
38 chatroom\*.mp.  
39 chat-room\*.mp.  
40 chat group\*.mp.  
41 chatgroup\*.mp.  
42 chat techno\*.mp.  
43 meebo.mp.  
44 "second life".mp.  
45 secondlife.mp.  
46 uhealth.mp.  
47 (ubiquit\* adj2 comput\*).mp.  
48 "u-comput\*".mp.  
49 patientslikeme\*.mp.  
50 "www.patientslikeme.com".mp.  
51 (digital adj2 divid\*).mp.  
52 (digital adj2 inequit\*).mp.  
53 "u-health\*".mp.  
54 "e-health\*".mp.  
55 epatient\*.mp.  
56 "e-patient\*".mp.  
57 edoctor\*.mp.  
58 e-doctor\*.mp.  
59 ephysician\*.mp.  
60 "e-physician\*".mp.  
61 microblog\*.mp.  
62 micro-blog\*.mp.  
63 facebook\*.mp.  
64 "information and communication technolog\*".mp. [added May 2 2012]  
65 ict.mp. [added May 2 2012]  
66 etechnolog\*.mp.  
67 e-technolog\*.mp.  
68 "health 2.0".mp.  
69 "web 2.0".mp.  
70 "academia.edu".mp.  
71 bebo.mp.  
72 dailystrength\*.mp.

73 livestrong\*.mp.  
74 epernicus\*.mp.  
75 experienceproject\*.mp.  
76 carepages\*.mp.  
77 caringbridge\*.mp.  
78 flickr\*.mp.  
79 fuelmyblog\*.mp.  
80 friendica\*.mp.  
81 friendster\*.mp.  
82 googleplus\*.mp.  
83 google plus.mp.  
84 hi5.mp.  
85 jaiku\*.mp.  
86 kiwibox\*.mp.  
87 linkedin\*.mp.  
88 myopera\*.mp.  
89 myspace\*.mp.  
90 netlog\*.mp.  
91 ning.mp.  
92 "ning.com".mp.  
93 "www.ning.com".mp.  
94 orkut\*.mp.  
95 pinterest\*.mp.  
96 researchgate\*.mp.  
97 sciencestage\*.mp.  
98 sonico.mp.  
99 stumbleupon\*.mp.  
10  
0 wasabi\*.mp.  
10  
1 "wasabi.com".mp.  
10  
2 wellwer\*.mp.  
10  
3 wooxie\*.mp.  
10  
4 social awareness\*.mp.  
10 "aim pages".mp.

5  
10 badoo\*.mp.  
6  
10 cyworld\*.mp.  
7  
10 drconnected\*.mp.  
8  
10 icarecafe\*.mp.  
9  
110 sanewire\*.mp.  
111 whoissick\*.mp.  
112 (social adj2 informatic\*).mp.  
113 (social adj2 infomatic\*).mp.  
114 diabetesmine\*.mp.  
115 "diabetesmine.com".mp.  
116 google wave\*.mp.  
117 "windows live".mp.  
118 "live messenger\*".mp.  
119 "aim messenger\*".mp.  
12  
0 "yahoo messenger\*".mp.  
12  
1 "microsoft messenger\*".mp.  
12  
2 compuserv\*.mp.  
12  
3 "america online".mp.  
12  
4 (technolog\* adj1 based adj1 intervention\*).mp. [June 10 2014]  
12  
5 mcare.tw.  
12  
6 "m-care".tw.  
12  
7 "connected care".tw.  
12  
8 (web-bas\* or webbas\*).mp,kw. [added March 18 2015]  
12  
9 internet/  
13 exp information science/

0  
13 telehealth/  
1  
13 information system/  
2  
13 online system/  
3  
13 computer system/  
4  
13 telecommunication/  
5  
13 teleconference/  
6  
13 computer interface/  
7  
13 human computer interaction/  
8  
13 social network/  
9  
14 social media/  
0  
14 (health\* adj1 communicat\* adj1 techn\*).mp.  
1  
14 exp computer network/  
2  
14 webcast/  
3  
14 interactive health communication.mp.  
4  
14 internet communication tool.mp.  
5  
14 internet communication.mp.  
6  
14 telemedicine/ not teledermatology.mp. not teleradiology.mp. not telepathology.mp.  
7 [mp=title, abstract, heading word, drug trade name, original title, device manufacturer, drug manufacturer, device trade name, keyword]  
14 or/1-147 [EMBASE Internet Hedge]  
8  
14 Chronic Disease/  
9  
15 (chronic\* adj2 ill\*).mp,kw.

0  
15  
1 (chronic\* adj disease\*).mp,kw.  
15  
2 (chronic\* adj2 disease\*).mp,kw.  
15  
3 polypatholog\*.mp,kw.  
15  
4 poly-patholog\*.mp,kw.  
15  
5 multiple comorbid\*.mp,kw.  
15  
6 multiple co-morbid\*.mp,kw.  
15  
7 (chronic adj2 patholog\*).mp,kw.  
15  
8 pluri-patholog\*.mp,kw.  
15  
9 multiple longterm condition?.mp,kw.  
16  
0 multiple long-term condition?.mp,kw.  
16  
1 (multi-morbid\* adj2 condition?).mp,kw.  
16  
2 (chronic\* adj2 condition?).mp,kw.  
16  
3 Comorbidity/  
16  
4 (long term adj2 condition?).mp,kw.  
16  
5 (longterm adj2 condition?).mp,kw.  
16  
6 (chronic adj2 medical adj2 problem\*).mp,kw.  
16  
7 multimorbid\*.mp,kw.  
16  
8 (multi-component? adj2 chronic).mp,kw.  
16  
9 (multicomponent? adj2 chronic).mp,kw.  
17  
0 comorbid\*.mp,kw.

17  
1 co-morbid\*.mp,kw.

17  
2 multimorbid\*.mp,kw.

17  
3 multi-morbid\*.mp,kw.

17  
4 (complex\* adj3 condition?).mp,kw.

17  
5 (complex adj2 care?).mp,kw.

17  
6 or/149-175 [EMBASE Chronic Illness or Polypathology or Multiple Morbidity]

17  
7 exp program evaluation/

17  
8 exp program development/

17  
9 exp pilot project/

18  
0 ((patient?? or inpatient?? or outpatient??) adj1 portal?).mp,kw.

18  
1 platform?.mp,kw.

18  
2 tool?.mp,kw.

18  
3 toolkit??.mp,kw.

18  
4 intervention studies/

18  
5 intervention?.mp,kw.

18  
6 prototype?.mp,kw.

18  
7 kiosk??.mp,kw.

18  
8 project?.mp,kw.

18  
9 ((patient? or inpatient? or outpatient?) adj2 program?).mp,kw.

19  
0 ((patient? or inpatient? or outpatient?) adj2 programme?).mp,kw.

19  
19 or/177-190 [Intervention or Portal or Tool & related terms]

1

19 148 and 176 and 191 [EMBASE Internet and Chronic Illness and Intervention Hedges]  
2

19 limit 192 to (human and english language)  
3

19 remove duplicates from 193  
4
