# Supplementary material for: Web-Based Tools for Text-Based Patient-Provider Communication in Chronic Conditions: Scoping Review
Source: PubMed Central journal article supplement (PMC5681721; doi:10.2196/jmir.7987), 2017-10-27
Supplement: jmir_v19i10e366_app3.pdf [file jmir_v19i10e366_app3.pdf]

### Appendix 3 Google Search Strategy

- the first 100 hits of the following strings will be examined for electronic communication tools that meet the specified inclusion and exclusion criteria

#### Key Terms

1. (electronic | online | web-based | web based | internet | computer-based) (“patient\*physician” | “patient\*nurse” | “patient\*clinician” | “patient\* provider” | “patient\*pharmacist”) (communication | messaging | contact) (tool | app | application | system | portal | platform | network)
2. (electronic | online | web-based | web based | internet | computer-based) (communication | messaging | contact) (tool | app | application | system | portal | platform | network)
3. (“patient\*physician” | “patient\*nurse” | “patient\*clinician” | “patient\* provider” | “patient\*pharmacist”) (communication | messaging | contact) (tool | app | application | system | portal | platform | network)
4. (healthcare | physician | provider | clinician | pharmacist | nurse) (eVisits | telehealth | telemedicine)
5. (healthcare | physician | provider | clinician | pharmacist | nurse) (eVisits) (tool | app | application | system | portal | platform | network)
6. (healthcare | physician | provider | clinician | pharmacist | nurse) (patient) (tool | app | application | system | portal | platform | network)
