# Supplementary material for: Web-Based Tools for Text-Based Patient-Provider Communication in Chronic Conditions: Scoping Review
Source: PubMed Central journal article supplement (PMC5681721; doi:10.2196/jmir.7987), 2017-10-27
Supplement: jmir_v19i10e366_app4.pdf [file jmir_v19i10e366_app4.pdf]

## Appendix 4 Data extraction form for published literature search

|     |                                                                               |                                                                                                          |
|-----|-------------------------------------------------------------------------------|----------------------------------------------------------------------------------------------------------|
|     |                                                                               | Reviewer response (not more than 1 sentence)                                                             |
| 1.  | Citation                                                                      | First Author:                                                                                            |
|     |                                                                               | Title:                                                                                                   |
|     |                                                                               | Journal:                                                                                                 |
|     |                                                                               | Year:                                                                                                    |
| 5.  | What type of publication is this paper?                                       | <input type="checkbox"/> original research study (observational study, randomized controlled trial etc.) |
|     |                                                                               | <input type="checkbox"/> editorial/commentary/news and views                                             |
|     |                                                                               | <input type="checkbox"/> review/meta-analysis                                                            |
|     |                                                                               | <input type="checkbox"/> protocol                                                                        |
|     |                                                                               | <input type="checkbox"/> RCT                                                                             |
|     |                                                                               | <input type="checkbox"/> Review                                                                          |
|     |                                                                               | <input type="checkbox"/> other: _____                                                                    |
| 12. | Is there a communication component to the tool?                               | <input type="checkbox"/> Yes                                                                             |
|     |                                                                               | <input type="checkbox"/> No<br>If no, do not continue.                                                   |
| 14. | Is the communication component the primary feature or a supplemental feature? | <input type="checkbox"/> Primary                                                                         |
|     |                                                                               | <input type="checkbox"/> Supplemental                                                                    |
| 16. | What is the primary functioning of the communication component of the tool?   | <input type="checkbox"/> Unstructured (Patient-provider free-form communication)                         |
|     |                                                                               | <input type="checkbox"/> Structured (Tailored feedback)                                                  |
| 18. | Is the tool findable (website url etc.)?                                      | <input type="checkbox"/> URL:                                                                            |
|     |                                                                               | <input type="checkbox"/> No, further information about the tool could not be found                       |
| 20. | What is the country of origin?                                                | Please specify:                                                                                          |
| 21. | At what stage of study is the tool?                                           | <input type="checkbox"/> Development                                                                     |
|     |                                                                               | <input type="checkbox"/> Feasibility and piloting                                                        |
|     |                                                                               | <input type="checkbox"/> Evaluation                                                                      |
|     |                                                                               | <input type="checkbox"/> Implementation                                                                  |
|     |                                                                               | <input type="checkbox"/> Other: _____                                                                    |
| 26. | In what context or setting is the tool used?                                  | <input type="checkbox"/> Healthcare                                                                      |
|     |                                                                               | <input type="checkbox"/> Non-healthcare                                                                  |
|     |                                                                               | <input type="checkbox"/> Other, please specify: _____                                                    |
|     |                                                                               | If non-healthcare tools, exclude<br>Further description, if needed:                                      |
| 30. | What clinical/disease area is the tool focused on?                            | <input type="checkbox"/> Cardiovascular disease                                                          |
|     |                                                                               | <input type="checkbox"/> Cancer                                                                          |

|     |                                                                      |                                                                                                                                                                                                                                                                                                                                                                                                                                                                                                  |
|-----|----------------------------------------------------------------------|--------------------------------------------------------------------------------------------------------------------------------------------------------------------------------------------------------------------------------------------------------------------------------------------------------------------------------------------------------------------------------------------------------------------------------------------------------------------------------------------------|
|     |                                                                      | <input type="checkbox"/> Stroke<br><input type="checkbox"/> Chronic respiratory diseases<br><input type="checkbox"/> Diabetes<br><input type="checkbox"/> Mental health<br><input type="checkbox"/> Non-specific<br><input type="checkbox"/> Other: _____                                                                                                                                                                                                                                        |
| 38. | What is the primary purpose of the tool?                             | <input type="checkbox"/> Patient-healthcare provider communication<br><input type="checkbox"/> Communication that is not between patients and healthcare providers<br><input type="checkbox"/> Health information storage, such as an EHR<br><input type="checkbox"/> Other: _____                                                                                                                                                                                                               |
| 42. | List all other functions of the tool beyond that mentioned in 6.     | Description:                                                                                                                                                                                                                                                                                                                                                                                                                                                                                     |
| 43. | Have any published studies been conducted which evaluated this tool? | <input type="checkbox"/> Yes<br><input type="checkbox"/> What study design?:<br><input type="checkbox"/> Randomized controlled trial<br><input type="checkbox"/> Observational study<br><input type="checkbox"/> Cohort<br><input type="checkbox"/> Case-control study<br><input type="checkbox"/> Non-randomized controlled trial<br><input type="checkbox"/> Controlled before and after study<br><input type="checkbox"/> Qualitative study<br><input type="checkbox"/> Cross-sectional study |
| 53. | If observational study, is it prospective or retrospective?          | <input type="checkbox"/> Prospective<br><input type="checkbox"/> Retrospective                                                                                                                                                                                                                                                                                                                                                                                                                   |
| 55. | Is this study a randomized controlled trial?                         | <input type="checkbox"/> Yes<br><input type="checkbox"/> If it was evaluated with the Medical Research Council Framework for Complex Interventions, check phase:<br><input type="checkbox"/> Phase I<br><input type="checkbox"/> Phase II<br><input type="checkbox"/> Phase III<br><input type="checkbox"/> Phase IV<br><input type="checkbox"/> No<br>Description:                                                                                                                              |
| 63. | If answered yes to 8, what outcomes were measured?                   | Description:                                                                                                                                                                                                                                                                                                                                                                                                                                                                                     |

|     |                                                                              |                                                                                                          |
|-----|------------------------------------------------------------------------------|----------------------------------------------------------------------------------------------------------|
|     |                                                                              |                                                                                                          |
| 64. | What was the study sample size?                                              | Description:                                                                                             |
| 65. | What is the length of follow-up?                                             | Description:<br><input type="checkbox"/> N/A                                                             |
| 67. | What medium does it use?                                                     | <input type="checkbox"/> Website-based                                                                   |
|     |                                                                              | <input type="checkbox"/> Cellular Phone-based Secure Messaging Service (“texting”)                       |
|     |                                                                              | <input type="checkbox"/> Software-based connected by internet                                            |
|     |                                                                              | <input type="checkbox"/> Web-based app                                                                   |
|     |                                                                              | <input type="checkbox"/> Native app                                                                      |
|     |                                                                              | <input type="checkbox"/> Hybrid web and native app                                                       |
|     |                                                                              | <input type="checkbox"/> Other: _____                                                                    |
| 74. | Is this tool a component of another system/platforms (i.e. EHR, care plan)?? | <input type="checkbox"/> Yes                                                                             |
|     |                                                                              | <input type="checkbox"/> If yes, how: _____                                                              |
|     |                                                                              | <input type="checkbox"/> No                                                                              |
|     |                                                                              | <input type="checkbox"/> If no, are there future plans for connectivity:                                 |
|     |                                                                              | <input type="checkbox"/> Yes, how: _____<br><input type="checkbox"/> No                                  |
| 80. | What credentials are used for logging in?                                    | <input type="checkbox"/> Email address                                                                   |
|     |                                                                              | <input type="checkbox"/> Password                                                                        |
|     |                                                                              | <input type="checkbox"/> Username                                                                        |
|     |                                                                              | <input type="checkbox"/> Banking credentials                                                             |
|     |                                                                              | <input type="checkbox"/> Other: _____                                                                    |
| 85. | What form of communication does the tool work by?                            | <input type="checkbox"/> Synchronous communication                                                       |
|     |                                                                              | <input type="checkbox"/> Asynchronous communication (end-users do not have to use the tool in real-time) |
|     |                                                                              | <input type="checkbox"/> Other: _____                                                                    |
| 88. | If asynchronous communication, is it time-limited?                           | <input type="checkbox"/> Yes                                                                             |
|     |                                                                              | <input type="checkbox"/> No                                                                              |
| 90. | Does the tool engage patients and/or caregivers?                             | <input type="checkbox"/> Select all that apply                                                           |
|     |                                                                              | <input type="checkbox"/> Adult patients (default)                                                        |
|     |                                                                              | <input type="checkbox"/> Children                                                                        |
|     |                                                                              | <input type="checkbox"/> Family Caregivers                                                               |
|     |                                                                              | <input type="checkbox"/> Parents                                                                         |
|     |                                                                              | <input type="checkbox"/> Paid Caregivers                                                                 |

|      |                                                                                                             |                                                                                                                    |
|------|-------------------------------------------------------------------------------------------------------------|--------------------------------------------------------------------------------------------------------------------|
| 96.  | What type of health care provider is intended to use the tool?                                              | <input type="checkbox"/> Nurse                                                                                     |
|      |                                                                                                             | <input type="checkbox"/> Physician                                                                                 |
|      |                                                                                                             | <input type="checkbox"/> Physician Assistant                                                                       |
|      |                                                                                                             | <input type="checkbox"/> Pharmacist                                                                                |
|      |                                                                                                             | <input type="checkbox"/> Allied Health Professional (Physiotherapist, Dietician, Social Worker, Psychologist etc.) |
|      |                                                                                                             | <input type="checkbox"/> Other: _____                                                                              |
| 102. | What is the study context/setting of use?                                                                   | <input type="checkbox"/> Academic                                                                                  |
|      |                                                                                                             | <input type="checkbox"/> Business (i.e. CVS, Walmart)                                                              |
|      |                                                                                                             | <input type="checkbox"/> Integrated healthcare organization (i.e. Kaiser Permanente)                               |
|      |                                                                                                             | <input type="checkbox"/> Primary care                                                                              |
|      |                                                                                                             | <input type="checkbox"/> Tertiary care outpatient clinics                                                          |
|      |                                                                                                             | <input type="checkbox"/> Inpatient hospital units                                                                  |
|      |                                                                                                             | <input type="checkbox"/> Other: _____                                                                              |
| 109. | What area of clinical specialty is/are the end-users?                                                       | Describe:                                                                                                          |
| 110. | Does the tool allow for team-based communication (more than a single health care provider can communicate)? | <input type="checkbox"/> Yes                                                                                       |
|      |                                                                                                             | <input type="checkbox"/> No                                                                                        |
|      |                                                                                                             | <input type="checkbox"/> Unclear                                                                                   |
| 113. | Does the patient communicate with their own healthcare provider?                                            | <input type="checkbox"/> Yes                                                                                       |
|      |                                                                                                             | <input type="checkbox"/> No                                                                                        |
|      |                                                                                                             | <input type="checkbox"/> Unclear                                                                                   |
| 116. | How is the tool made                                                                                        | <input type="checkbox"/> Freely available                                                                          |
|      |                                                                                                             | <input type="checkbox"/> Registration required to use                                                              |
|      |                                                                                                             | <input type="checkbox"/> Payment required                                                                          |
|      |                                                                                                             | <input type="checkbox"/> User pays                                                                                 |
|      |                                                                                                             | <input type="checkbox"/> Organizational license                                                                    |
|      |                                                                                                             | <input type="checkbox"/> Other form of monetary revenue: _____                                                     |
| 122. | What is the name of the tool?                                                                               | Description:                                                                                                       |
