# Supplementary material for: Web-Based Tools for Text-Based Patient-Provider Communication in Chronic Conditions: Scoping Review
Source: PubMed Central journal article supplement (PMC5681721; doi:10.2196/jmir.7987), 2017-10-27
Supplement: jmir_v19i10e366_app5.pdf [file jmir_v19i10e366_app5.pdf]

## Appendix 5 Internet data extraction form

|     |                                                                      | Reviewer response (not more than 1 sentence)                                                             |
|-----|----------------------------------------------------------------------|----------------------------------------------------------------------------------------------------------|
| 1.  | URL                                                                  |                                                                                                          |
| 2.  | Type of website                                                      | <input type="checkbox"/> Business                                                                        |
|     |                                                                      | <input type="checkbox"/> Healthcare                                                                      |
|     |                                                                      | <input type="checkbox"/> Other: _____                                                                    |
| 5.  | Name of the organization                                             |                                                                                                          |
| 6.  | Name of the tool                                                     |                                                                                                          |
| 7.  | Tool developer                                                       |                                                                                                          |
| 8.  | Terminology for the platform                                         |                                                                                                          |
| 9.  | Linked to health record?                                             | <input type="checkbox"/> Yes                                                                             |
|     |                                                                      | <input type="checkbox"/> No                                                                              |
|     |                                                                      | <input type="checkbox"/> Unclear                                                                         |
| 12. | Payment/compensation for healthcare providers?                       | <input type="checkbox"/> Yes                                                                             |
|     |                                                                      | <input type="checkbox"/> If yes, please specify: _____                                                   |
|     |                                                                      | <input type="checkbox"/> No                                                                              |
|     |                                                                      | <input type="checkbox"/> Unclear                                                                         |
| 16. | Target population                                                    |                                                                                                          |
| 17. | Does this tool engage patients and/or caregivers?                    | <input type="checkbox"/> Yes                                                                             |
|     |                                                                      | <input type="checkbox"/> No                                                                              |
|     |                                                                      | <input type="checkbox"/> Unclear                                                                         |
| 20. | What type of provider is intended to use this tool with the patient? | <input type="checkbox"/> Doctor                                                                          |
|     |                                                                      | <input type="checkbox"/> Nurse                                                                           |
|     |                                                                      | <input type="checkbox"/> Other: _____                                                                    |
| 23. | What form of communication does the tool work by?                    | <input type="checkbox"/> Synchronous communication                                                       |
|     |                                                                      | <input type="checkbox"/> Asynchronous communication (end-users do not have to use the tool in real-time) |
|     |                                                                      | <input type="checkbox"/> Other: _____                                                                    |
| 26. | If asynchronous communication, is it time-limited?                   | <input type="checkbox"/> Yes                                                                             |
|     |                                                                      | <input type="checkbox"/> No                                                                              |
|     |                                                                      | <input type="checkbox"/> Unclear                                                                         |
| 29. | Does the tool allow for team-based                                   | <input type="checkbox"/> Yes                                                                             |

|     |                                                                                     |                                                              |
|-----|-------------------------------------------------------------------------------------|--------------------------------------------------------------|
|     | communication (more than a single health care provider can communicate)?            | <input type="checkbox"/> No                                  |
|     |                                                                                     | <input type="checkbox"/> Unclear                             |
| 32. | Does this tool allow the patient to communicate with their own healthcare provider? | <input type="checkbox"/> Yes                                 |
|     |                                                                                     | <input type="checkbox"/> No                                  |
|     |                                                                                     | <input type="checkbox"/> Unclear                             |
| 35. | Can patients self-register to use the tool?                                         | <input type="checkbox"/> Yes                                 |
|     |                                                                                     | <input type="checkbox"/> No (prior verification is required) |
|     |                                                                                     | <input type="checkbox"/> Unclear                             |
| 38. | Has the tool been identified through the published literature?                      | <input type="checkbox"/> Yes                                 |
|     |                                                                                     | <input type="checkbox"/> No                                  |
| 40. | Country of origin:                                                                  |                                                              |
| 41. | Year last updated:                                                                  |                                                              |
