# Supplementary material for: Web-Based Tools for Text-Based Patient-Provider Communication in Chronic Conditions: Scoping Review
Source: PubMed Central journal article supplement (PMC5681721; doi:10.2196/jmir.7987), 2017-10-27
Supplement: jmir_v19i10e366_app6.pdf [file jmir_v19i10e366_app6.pdf]

## Appendix 6

### Coding Framework

| <b>Article Characteristics</b>                                                                                                                                                     |
|------------------------------------------------------------------------------------------------------------------------------------------------------------------------------------|
| <b>Setting</b>                                                                                                                                                                     |
| Tertiary care- the intervention is evaluated in a tertiary care setting, may be outpatient care (i.e. healthcare provider is a specialist or works in a specialty clinic)          |
| Primary care- the intervention is evaluated in a primary care/community setting (i.e. healthcare provider is in primary care or general practice)                                  |
| Academic- the intervention is evaluated through an academic setting (i.e. healthcare provider is based out of a university department, such as Behavioral Sciences)                |
| Business- intervention is evaluated in a business context (i.e. through CVS Pharmacy, Walmart)                                                                                     |
| <b>Tool Characteristics</b>                                                                                                                                                        |
| <b>Medium of communication</b>                                                                                                                                                     |
| Website- URL accessible via an internet browser (whether mobile or computer-based)                                                                                                 |
| Hybrid website/software application- an intervention which uses a software application and uploads information to the internet, which may have a web-based interface as well       |
| Mobile phone-based native application (i.e. SMS)- an app usable on cell phone                                                                                                      |
| Software- a program installed on a computer's hard drive that may be linked to the internet, but stores information on the computer itself as oppose to online                     |
| Email-based application- a tool which makes use of email (i.e. text-based communication exchange which houses data on the server of the sender and on the server of the recipient) |
| <b>Functionality</b>                                                                                                                                                               |
| Asynchronous- non-concurrent communication between patient and healthcare provider                                                                                                 |
| Synchronous- patient and healthcare provider(s) must use the tool at the same time (ie telephone)                                                                                  |
| <b>Type of communication</b>                                                                                                                                                       |
| Unstructured communication (patient-provider free-form)- two-way unstructured text-based dialogue                                                                                  |
| Structured communication- structured responses or recommendations by a trained end-user (healthcare provider/therapist/research assistant) to information input from the patient   |
| <b>Intended use</b>                                                                                                                                                                |
| Lifestyle/behavior modification- altering habits or behaviors to improve patient management of illness                                                                             |
| Symptom management- reporting, monitoring or medical treatment related to the care of specific symptoms                                                                            |
| Care planning- developing and adherence to protocol for administration and receipt of care and medical procedures                                                                  |
| Medication adherence- adherence to prescribed medications                                                                                                                          |
| <b>Evaluation</b>                                                                                                                                                                  |
| <b>Study design<sup>a</sup></b>                                                                                                                                                    |
| Randomized controlled trial- an experimental study in which people are randomly allocated to different interventions                                                               |
| Cohort study- a study in which a defined group of people (the cohort) is followed over time,                                                                                       |

|                                                                                                                                                                                                                                                                                                                                                                   |
|-------------------------------------------------------------------------------------------------------------------------------------------------------------------------------------------------------------------------------------------------------------------------------------------------------------------------------------------------------------------|
| to examine associations between different interventions received and subsequent outcomes. A 'prospective' cohort study recruits participants before any intervention and follows them into the future. A 'retrospective' cohort study identifies subjects from past records describing the interventions received and follows them from the time of those records |
| Case-control study- a study that compares people with a specific outcome of interest ('cases') with people from the same source population but without that outcome ('controls'), to examine the association between the outcome and prior exposure.                                                                                                              |
| Quasi-experimental/Non-randomized controlled trial- an experimental study in which people are allocated to different interventions using methods that are not random.                                                                                                                                                                                             |
| Cross-sectional study- a study that collects information on interventions (past or present) and current health outcomes, i.e. restricted to health states, for a group of people at a particular point in time, to examine associations between the outcomes and exposure to interventions                                                                        |
| Cost-effectiveness analysis- a study evaluating costs, especially relative to effect or utility of an intervention                                                                                                                                                                                                                                                |
| Qualitative study- involving a method of data collection comprising interviews and focus groups; data is narrative in nature. Approaches include grounded theory, ethnography, phenomenology                                                                                                                                                                      |
| <b>Stage of evaluation<sup>b</sup></b>                                                                                                                                                                                                                                                                                                                            |
| Development- identifying evidence base, identifying or developing theory, modelling processes and outcomes                                                                                                                                                                                                                                                        |
| Feasibility/piloting- testing procedures, estimating recruitment and retention, determining sample size                                                                                                                                                                                                                                                           |
| Evaluation- assessing effectiveness, understanding change processes, assessing cost-effectiveness                                                                                                                                                                                                                                                                 |
| Implementation- dissemination, surveillance and monitoring, long-term follow-up                                                                                                                                                                                                                                                                                   |
| <b>Outcomes</b>                                                                                                                                                                                                                                                                                                                                                   |
| Health outcomes- clinical data, quality of life or care, healthcare utilization, illness knowledge                                                                                                                                                                                                                                                                |
| Usability[1]- ease of use related outcomes                                                                                                                                                                                                                                                                                                                        |
| Usage- how the tool was used, e.g. frequency of use                                                                                                                                                                                                                                                                                                               |
| Costs- medical costs, costs related to implementation or use                                                                                                                                                                                                                                                                                                      |
| Acceptability/Feasibility (collected via questionnaire)[1]- described as feasibility or acceptability measure including satisfaction with implementation, interest, willingness-to-use, attitudes                                                                                                                                                                 |
| Experience (open-ended/unstructured responses)- focused on perceptions around the intervention                                                                                                                                                                                                                                                                    |
| Clinical- clinical data, quality of life or care, healthcare utilization, knowledge                                                                                                                                                                                                                                                                               |

<sup>a</sup>Adapted from the Cochrane Handbook for Systematic Reviews[2]

<sup>b</sup>Based on the MRC 2008 Framework for the Evaluation of Complex Interventions[3]

## References

1. Kushniruk AW, Patel VL, Cimino JJ. Usability testing in medical informatics: cognitive approaches to evaluation of information systems and user interfaces. Proc AMIA Annu Fall Symp. 1997:218-22. PMID: 9357620.
2. Higgins JPT, Green S. Cochrane Handbook for Systematic Reviews of Interventions The Cochrane Collaboration; 2011.
3. Craig P, Dieppe P, Macintyre S, Michie S, Nazareth I, Petticrew M, et al. Developing and evaluating complex interventions: the new Medical Research Council guidance. BMJ. 2008 Sep 29;337:a1655. PMID: 18824488. doi: 10.1136/bmj.a1655.
