# Supplementary material for: Web-Based Tools for Text-Based Patient-Provider Communication in Chronic Conditions: Scoping Review
Source: PubMed Central journal article supplement (PMC5681721; doi:10.2196/jmir.7987), 2017-10-27
Supplement: jmir_v19i10e366_app7.pdf [file jmir_v19i10e366_app7.pdf]

## Appendix 7 References by selected tool design and function

|     | <b>Reference</b>                             | <b>Article description of tool</b>     | <b>Medium/format of communication</b> | <b>Healthcare provider using the tool</b> | <b>Patient-provider communication flow</b> | <b>Type of communication</b> | <b>Functions in addition to communication?</b> |
|-----|----------------------------------------------|----------------------------------------|---------------------------------------|-------------------------------------------|--------------------------------------------|------------------------------|------------------------------------------------|
| 1.  | Armstrong et al. 2015[1]                     | Online model for follow-up management  | Website-based tool                    | Physician                                 | One-to-one                                 | Asynchronous (not real-time) | Yes                                            |
| 2.  | Riipa et al. 2014[2]<br>Riipa et al. 2014[3] | Patient portal                         | Website-based tool                    | Physician/<br>Nurse/care team             | Patient-multiple providers                 | Asynchronous (not real-time) | Yes                                            |
| 3.  | Ben-Zeev et al. 2014[4]                      | Text-messaging                         | Mobile phone-based application        | Social worker                             | One-to-one                                 | Asynchronous (not real-time) | No                                             |
| 4.  | Lau et al. 2014[5]                           | Patient portal                         | Website-based tool                    | Physician/<br>Nurse/care team             | Patient-multiple providers                 | Asynchronous (not real-time) | Yes                                            |
| 5.  | Ryan et al. 2013[6]                          | Internet-based suite of applications   | Website-based tool                    | Interdisciplinary team of providers       | Patient-multiple providers                 | Asynchronous (not real-time) | Yes                                            |
| 6.  | Hsiao et al. 2011[7]                         | Secure electronic messaging system     | Website-based tool                    | Physician/<br>Nurse                       | Patient-multiple providers                 | Asynchronous (not real-time) | No                                             |
| 7.  | van der Meer et al. 2009[8]                  | Internet-based self-management         | Website-based tool                    | Nurse                                     | One-to-one                                 | Asynchronous (not real-time) | Yes                                            |
| 8.  | Siva et al. 2008[9]                          | Email                                  | Email-based application               | Physician                                 | One-to-one                                 | Asynchronous (not real-time) | No                                             |
| 9.  | Vernmark et al. 2010[10]                     | Email therapy                          | Email-based application               | Therapist                                 | One-to-one                                 | Asynchronous (not real-time) | No                                             |
| 10. | Berger et al. 2011[11]                       | Therapist-guided self-help using email | Email-based application               | Therapist                                 | One-to-one                                 | Asynchronous (not real-time) | No                                             |
| 11. | van Bastelaar et al. 2008[12]                | Web-based self-help                    | Website-based                         | Psychologist                              | One-to-one                                 | Asynchronous (not real-time) | Yes                                            |

|     |                                                                     |                                                |                                       |              |            |                              |     |
|-----|---------------------------------------------------------------------|------------------------------------------------|---------------------------------------|--------------|------------|------------------------------|-----|
| 12. | Allen et al. 2008[13]                                               | E-coaching                                     | Website-based                         | Nurse        | One-to-one | Asynchronous (not real-time) | Yes |
| 13. | Nilsson et al. 2006[14]                                             | Information and Communication Technology (ICT) | Hybrid web and software application   | Nurse        | One-to-one | Asynchronous (not real-time) | No  |
| 14. | Ross et al. 2004[15]                                                | Patient-accessible online medical record       | Website-based                         | Nurse        | One-to-one | Asynchronous (not real-time) | Yes |
| 15. | Jones et al. 2015[16]                                               | Web portal                                     | Website-based                         | Psychologist | One-to-one | Asynchronous (not real-time) | Yes |
| 16. | Blomfield et al. 2014[17]                                           | E-feedback                                     | Website-based                         | Nurse        | One-to-one | Asynchronous (not real-time) | Yes |
| 17. | van Straten et al. 2014[18]                                         | Guided internet intervention                   | Website-based                         | Nurse        | One-to-one | Asynchronous (not real-time) | Yes |
| 18. | Wayne et al. 2014[19]                                               | Smartphone-assisted intervention               | Mobile phone-based native application | Nurse        | One-to-one | Asynchronous (not real-time) | Yes |
| 19. | Barberan-Garcia et al. 2014[20]                                     | Information and Communication Technology (ICT) | Hybrid web and software application   | Psychologist | One-to-one | Asynchronous (not real-time) | Yes |
| 20. | Mota Pereira et al. 2014[21]                                        | Facebook                                       | Website-based tool                    | Physician    | One-to-one | Asynchronous (not real-time) | No  |
| 21. | Lee et al. 2016[22]                                                 | Facebook                                       | Website-based tool                    | Physician    | One-to-one | Asynchronous (not real-time) | No  |
| 22. | Nobis et al. 2013[23]                                               | Web-based intervention                         | Website-based tool                    | Psychologist | One-to-one | Asynchronous (not real-time) | Yes |
| 23. | Fishman et al. 2013[24]<br>Harris et al. 2009[25]<br>Weppner et al. | Shared medical record                          | Website-based tool                    | Pharmacist   | One-to-one | Asynchronous (not real-time) | Yes |

|     |                          |                                                                 |                                       |                                                              |                            |                              |     |
|-----|--------------------------|-----------------------------------------------------------------|---------------------------------------|--------------------------------------------------------------|----------------------------|------------------------------|-----|
|     | 2010[26]                 |                                                                 |                                       |                                                              |                            |                              |     |
| 24. | Zhang et al. 2013[27]    | Internet of Things technology                                   | Hybrid web and software application   | Medical staff                                                | One-to-one                 | Asynchronous (not real-time) | Yes |
| 25. | Nguyen et al. 2013[28]   | Internet-based collaborative self-monitoring                    | Website-based tool                    | Nurse                                                        | One-to-one                 | Synchronous (real-time)      | Yes |
| 26. | Solomon et al. 2012[29]  | Web-based intervention                                          | Website-based tool                    | Unclear                                                      | One-to-one                 | Asynchronous (not real-time) | Yes |
| 27. | Ahmed et al. 2011[30]    | Patient portal                                                  | Website-based tool                    | Nurse                                                        | One-to-one                 | Asynchronous (not real-time) | Yes |
| 28. | Brennan et al. 2010[31]  | Technology-enhanced practice                                    | Website-based tool                    | Nurse                                                        | One-to-one                 | Asynchronous (not real-time) | Yes |
| 29. | Sarkar et al. 2010[32]   | Patient portal                                                  | Website-based tool                    | Physician                                                    | One-to-one                 | Asynchronous (not real-time) | Yes |
| 30. | Zickmund et al. 2008[33] | Patient portal                                                  | Website-based tool                    | Physician                                                    | One-to-one                 | Asynchronous (not real-time) | Yes |
| 31. | Bond et al. 2007[34]     | Internet-based self-management                                  | Website-based tool                    | Nurse                                                        | One-to-one                 | Both                         | Yes |
| 32. | Komives et al. 2005[35]  | Patient portal                                                  | Website-based tool                    | Physician                                                    | One-to-one                 | Asynchronous (not real-time) | Yes |
| 33. | Gomez et al. 2002[36]    | Internet-based self-management                                  | Website-based tool                    | Physician<br>Psychologist<br>Social Worker                   | Patient-multiple providers | Asynchronous (not real-time) | Yes |
| 34. | Huang et al. 2014[37]    | Internet-based self-management                                  | Mobile phone-based native application | Unclear                                                      | One-to-one                 | Asynchronous (not real-time) | No  |
| 35. | Gulmans et al. 2010[38]  | Web-based system for patient-professional and interprofessional | Website-based tool                    | Physician<br>Physiotherapist<br>School/day care professional | Patient-multiple providers | Asynchronous (not real-time) | Yes |

|     |                                                                                                                                |                                                             |                                     |                                     |                            |                              |     |
|-----|--------------------------------------------------------------------------------------------------------------------------------|-------------------------------------------------------------|-------------------------------------|-------------------------------------|----------------------------|------------------------------|-----|
|     |                                                                                                                                | communication                                               |                                     |                                     |                            |                              |     |
| 36. | Oerlemans et al. 2011[39]                                                                                                      | Cognitive Behaviour Therapy with personal digital assistant | Hybrid web and software application | Psychologist                        | One-to-one                 | Asynchronous (not real-time) | Yes |
| 37. | Nes et al. 2012[40]                                                                                                            | Web-based diaries                                           | Hybrid web and software application | Nurse                               | One-to-one                 | Asynchronous (not real-time) | No  |
| 38. | Kristjansdottir et al. 2013[41]<br>Kristjansdottir et al. 2013[42]<br>Kristjansdottir et al. 2011[43]<br>Jelin et al. 2012[44] | Web-based self-management                                   | Website-based tool                  | Nurse or physician                  | One-to-one                 | Asynchronous (not real-time) | Yes |
| 39. | McMahon et al. 2005[45]<br>Fonda et al. 2009[46]                                                                               | Internet-based care management                              | Website-based tool                  | Counsellor<br>Care Manager          | One-to-one                 | Asynchronous (not real-time) | Yes |
| 40. | Homko et al. 2007[47]                                                                                                          | Internet-based telemedicine system                          | Website-based tool                  | Unclear                             | Patient-multiple providers | Asynchronous (not real-time) | Yes |
| 41. | Ralston et al. 2009[48]                                                                                                        | Web-based care management                                   | Website-based tool                  | Care Manager                        | One-to-one                 | Asynchronous (not real-time) | Yes |
| 42. | Tang et al. 2013[49]                                                                                                           | Personal Health Record                                      | Website-based tool                  | Nurse                               | One-to-one                 | Asynchronous (not real-time) | Yes |
| 43. | Zutz et al. 2007[50]                                                                                                           | Virtual cardiac rehabilitation                              | Website-based tool                  | Nurse/Dietitian/Exercise specialist | One-to-one                 | Synchronous (real-time)      | Yes |
| 44. | Quinn et al. 2011[51]                                                                                                          | Patient web portal                                          | Website-based tool                  | Counsellor                          | One-to-one                 | Asynchronous (not real-time) | Yes |
| 45. | Liebreich et al. 2009[52]                                                                                                      | Website and email-linked counselling intervention           | Website-based tool                  | Counsellor                          | One-to-one                 | Asynchronous (not real-time) | Yes |

|     |                        |                                                |                                     |              |                            |                              |     |
|-----|------------------------|------------------------------------------------|-------------------------------------|--------------|----------------------------|------------------------------|-----|
| 46. | Bergmo et al. 2009[53] | Web-based consultations                        | Hybrid web and software application | Physician    | One-to-one                 | Asynchronous (not real-time) | No  |
| 47. | Meglic et al. 2010[54] | Information and Communication Technology (ICT) | Website-based tool                  | Care Manager | Patient-multiple providers | Asynchronous (not real-time) | Yes |

## **References**

1. Armstrong AW, Johnson MA, Lin S, Maverakis E, Fazel N, Liu FT. Patient-centered, direct-access online care for management of atopic dermatitis: a randomized clinical trial. *JAMA Dermatol.* 2015 Feb;151(2):154-60. PMID: 25338198. doi: 10.1001/jamadermatol.2014.2299.
2. Riippa I, Linna M, Ronkko I. The effect of a patient portal with electronic messaging on patient activation among chronically ill patients: controlled before-and-after study. *J Med Internet Res.* 2014;16(11):e257. PMID: 25413368.
3. Riippa I, Linna M, Ronkko I, Kroger V. Use of an electronic patient portal among the chronically ill: an observational study. *J Med Internet Res.* 2014;16(12):e275. PMID: 25488754. doi: 10.2196/jmir.3722.
4. Ben-Zeev D, Kaiser SM, Krzos I. Remote "hovering" with individuals with psychotic disorders and substance use: feasibility, engagement, and therapeutic alliance with a text-messaging mobile interventionist. *J Dual Diagn.* 2014;10(4):197-203. PMID: 25391277. doi: 10.1080/15504263.2014.962336.
5. Lau M, Campbell H, Tang T, Thompson DJ, Elliott T. Impact of patient use of an online patient portal on diabetes outcomes. *Can J Diabetes.* 2014 Feb;38(1):17-21. PMID: 24485208. doi: 10.1016/j.cjcd.2013.10.005.
6. Ryan JG, Schwartz R, Jennings T, Fedders M, Vittoria I. Feasibility of an internet-based intervention for improving diabetes outcomes among low-income patients with a high risk for poor diabetes outcomes followed in a community clinic. *Diabetes Educ.* 2013 May-Jun;39(3):365-75. PMID: 23610181. doi: 10.1177/0145721713484594.
7. Hsiao AL, Bazy-Asaad A, Tolomeo C, Edmonds D, Belton B, Benin AL. Secure web messaging in a pediatric chronic care clinic: a slow takeoff of "kids' airmail". *Pediatrics.* 2011 Feb;127(2):e406-13. PMID: 21220392. doi: 10.1542/peds.2010-1086.
8. van der Meer V, Bakker MJ, van den Hout WB, Rabe KF, Sterk PJ, Kievit J, et al. Internet-based self-management plus education compared with usual care in asthma: a randomized trial. *Ann Intern Med.* 2009 Jul 21;151(2):110-20. PMID: 19620163.
9. Siva C, Smarr KL, Hanson KD, Parikh M, Lawlor K, Ge B. Internet use and e-mail communications between patients and providers: a survey of rheumatology outpatients. *J Clin Rheumatol.* 2008 Dec;14(6):318-23. PMID: 19033871. doi: 10.1097/RHU.0b013e318190b636.
10. Vernmark K, Lenndin J, Bjarehed J, Carlsson M, Karlsson J, Oberg J, et al. Internet administered guided self-help versus individualized e-mail therapy: A randomized trial of two versions of CBT for major depression. *Behav Res Ther.* 2010 May;48(5):368-76. PMID: 20152960. doi: 10.1016/j.brat.2010.01.005.
11. Berger T, Hammerli K, Gubser N, Andersson G, Caspar F. Internet-based treatment of depression: a randomized controlled trial comparing guided with unguided self-help. *Cogn Behav Ther.* 2011;40(4):251-66. PMID: 22060248. doi: 10.1080/16506073.2011.616531.
12. van Bastelaar KM, Pouwer F, Cuijpers P, Twisk JW, Snoek FJ. Web-based cognitive behavioural therapy (W-CBT) for diabetes patients with co-morbid depression: design of a randomised controlled trial. *BMC Psychiatry.* 2008 Feb 19;8:9. PMID: 18284670. doi: 10.1186/1471-244X-8-9.
13. Allen M, Iezzoni LI, Huang A, Huang L, Leveille SG. Improving patient-clinician communication about chronic conditions: description of an internet-based nurse E-coach intervention. *Nurs Res.* 2008 Mar-Apr;57(2):107-12. PMID: 18347482.

14. Nilsson C, Ohman M, Soderberg S. Information and communication technology in supporting people with serious chronic illness living at home - an intervention study. *J Telemed Telecare*. 2006;12(4):198-202. PMID: 16774702. doi: 10.1258/135763306777488807.
15. Ross SE, Moore LA, Earnest MA, Wittevrongel L, Lin CT. Providing a web-based online medical record with electronic communication capabilities to patients with congestive heart failure: randomized trial. *J Med Internet Res*. 2004 May 14;6(2):e12. PMID: 15249261. doi: 10.2196/jmir.6.2.e12.
16. Jones JB, Weiner JP, Shah NR, Stewart WF. The wired patient: patterns of electronic patient portal use among patients with cardiac disease or diabetes. *J Med Internet Res*. 2015;17(2):e42. PMID: 25707036. doi: 10.2196/jmir.3157.
17. Blomfield RL, Collins CE, Hutchesson MJ, Young MD, Jensen ME, Callister R, et al. Impact of self-help weight loss resources with or without online support on the dietary intake of overweight and obese men: the SHED-IT randomised controlled trial. *Obes Res Clin Pract*. 2014 Sep-Oct;8(5):e476-87. PMID: 25263837. doi: 10.1016/j.orcp.2013.09.004.
18. van Straten A, Emmelkamp J, de Wit J, Lancee J, Andersson G, van Someren EJ, et al. Guided Internet-delivered cognitive behavioural treatment for insomnia: a randomized trial. *Psychol Med*. 2014 May;44(7):1521-32. PMID: 24001364. doi: 10.1017/S0033291713002249.
19. Wayne N, Ritvo P. Smartphone-enabled health coach intervention for people with diabetes from a modest socioeconomic strata community: single-arm longitudinal feasibility study. *J Med Internet Res*. 2014 Jun 06;16(6):e149. PMID: 24907918. doi: 10.2196/jmir.3180.
20. Barberan-Garcia A, Vogiatzis I, Solberg HS, Vilaro J, Rodriguez DA, Garasen HM, et al. Effects and barriers to deployment of telehealth wellness programs for chronic patients across 3 European countries. *Respir Med*. 2014 Apr;108(4):628-37. PMID: 24451438. doi: 10.1016/j.rmed.2013.12.006.
21. Mota Pereira J. Facebook enhances antidepressant pharmacotherapy effects. *ScientificWorldJournal*. 2014;2014:892048. PMID: 24574930. doi: 10.1155/2014/892048.
22. Lee JL, Choudhry NK, Wu AW, Matlin OS, Brennan TA, Shrank WH. Patient Use of Email, Facebook, and Physician Websites to Communicate with Physicians: A National Online Survey of Retail Pharmacy Users. *J Gen Intern Med*. 2016 Jan;31(1):45-51. PMID: 26105675. doi: 10.1007/s11606-015-3374-7.
23. Nobis S, Lehr D, Ebert DD, Berking M, Heber E, Baumeister H, et al. Efficacy and cost-effectiveness of a web-based intervention with mobile phone support to treat depressive symptoms in adults with diabetes mellitus type 1 and type 2: design of a randomised controlled trial. *BMC Psychiatry*. 2013 Nov 15;13:306. PMID: 24238346. doi: 10.1186/1471-244X-13-306.
24. Fishman PA, Cook AJ, Anderson ML, Ralston JD, Catz SL, Carrell D, et al. Improving BP control through electronic communications: an economic evaluation. *Am J Manag Care*. 2013 Sep;19(9):709-16. PMID: 24304254.
25. Harris LT, Haneuse SJ, Martin DP, Ralston JD. Diabetes quality of care and outpatient utilization associated with electronic patient-provider messaging: a cross-sectional analysis. *Diabetes Care*. 2009 Jul;32(7):1182-7. PMID: 19366959. doi: 10.2337/dc08-1771.
26. Weppner WG, Ralston JD, Koepsell TD, Grothaus LC, Reid RJ, Jordan L, et al. Use of a shared medical record with secure messaging by older patients with diabetes. *Diabetes Care*. 2010 Nov;33(11):2314-9. PMID: 20739686. doi: 10.2337/dc10-1124.
27. Zhang J, Song YL, Bai CX. MIOTIC study: a prospective, multicenter, randomized study to evaluate the long-term efficacy of mobile phone-based Internet of Things in the management

- of patients with stable COPD. *Int J Chron Obstruct Pulmon Dis*. 2013;8:433-8. PMID: 24082784. doi: 10.2147/COPD.S50205.
28. Nguyen HQ, Donesky D, Reinke LF, Wolpin S, Chyall L, Benditt JO, et al. Internet-based dyspnea self-management support for patients with chronic obstructive pulmonary disease. *J Pain Symptom Manage*. 2013 Jul;46(1):43-55. PMID: 23073395. doi: 10.1016/j.jpainsymman.2012.06.015.
  29. Solomon M, Wagner SL, Goes J. Effects of a Web-based intervention for adults with chronic conditions on patient activation: online randomized controlled trial. *J Med Internet Res*. 2012 Feb 21;14(1):e32. PMID: 22353433. doi: 10.2196/jmir.1924.
  30. Ahmed S, Bartlett SJ, Ernst P, Pare G, Kanter M, Perreault R, et al. Effect of a web-based chronic disease management system on asthma control and health-related quality of life: study protocol for a randomized controlled trial. *Trials*. 2011 Dec 14;12:260. PMID: 22168530. doi: 10.1186/1745-6215-12-260.
  31. Brennan PF, Casper GR, Burke LJ, Johnson KA, Brown R, Valdez RS, et al. Technology-enhanced practice for patients with chronic cardiac disease: home implementation and evaluation. *Heart Lung*. 2010 Nov-Dec;39(6 Suppl):S34-46. PMID: 21092830. doi: 10.1016/j.hrtlng.2010.09.003.
  32. Sarkar U, Karter AJ, Liu JY, Adler NE, Nguyen R, Lopez A, et al. The literacy divide: health literacy and the use of an internet-based patient portal in an integrated health system—results from the diabetes study of northern California (DISTANCE). *J Health Commun*. 2010;15 Suppl 2:183-96. PMID: 20845203. doi: 10.1080/10810730.2010.499988.
  33. Zickmund SL, Hess R, Bryce CL, McTigue K, Olshansky E, Fitzgerald K, et al. Interest in the use of computerized patient portals: role of the provider-patient relationship. *J Gen Intern Med*. 2008 Jan;23 Suppl 1:20-6. PMID: 18095039. doi: 10.1007/s11606-007-0273-6.
  34. Bond GE, Burr R, Wolf FM, Price M, McCurry SM, Teri L. The effects of a web-based intervention on the physical outcomes associated with diabetes among adults age 60 and older: a randomized trial. *Diabetes Technol Ther*. 2007 Feb;9(1):52-9. PMID: 17316098.
  35. Komives EM. Clinician-patient E-mail communication: challenges for reimbursement. *N C Med J*. 2005 May-Jun;66(3):238-40. PMID: 16130953.
  36. Gomez EJ, Caceres C, Lopez D, Del Pozo F. A web-based self-monitoring system for people living with HIV/AIDS. *Comput Methods Programs Biomed*. 2002 Jul;69(1):75-86. PMID: 12088595.
  37. Huang JS, Terrones L, Tompane T, Dillon L, Pian M, Gottschalk M, et al. Preparing adolescents with chronic disease for transition to adult care: a technology program. *Pediatrics*. 2014 Jun;133(6):e1639-46. PMID: 24843066. doi: 10.1542/peds.2013-2830.
  38. Gulmans J, Vollenbroek-Hutten MM, Visser JJ, Nijeweme-d'Hollosy WO, van Gemert-Pijnen JE, van Harten WH. A web-based communication system for integrated care in cerebral palsy: design features, technical feasibility and usability. *J Telemed Telecare*. 2010;16(7):389-93. PMID: 20736247. doi: 10.1258/jtt.2010.091013.
  39. Oerlemans S, van Cranenburgh O, Herremans PJ, Spreeuwenberg P, van Dulmen S. Intervening on cognitions and behavior in irritable bowel syndrome: A feasibility trial using PDAs. *J Psychosom Res*. 2011 Mar;70(3):267-77. PMID: 21334498. doi: 10.1016/j.jpsychores.2010.09.018.
  40. Nes AA, van Dulmen S, Eide E, Finset A, Kristjansdottir OB, Steen IS, et al. The development and feasibility of a web-based intervention with diaries and situational feedback via



- smartphone to support self-management in patients with diabetes type 2. *Diabetes Res Clin Pract.* 2012 Sep;97(3):385-93. PMID: 22578890. doi: 10.1016/j.diabres.2012.04.019.
41. Kristjansdottir OB, Fors EA, Eide E, Finset A, Stensrud TL, van Dulmen S, et al. A smartphone-based intervention with diaries and therapist feedback to reduce catastrophizing and increase functioning in women with chronic widespread pain. part 2: 11-month follow-up results of a randomized trial. *J Med Internet Res.* 2013 Mar 28;15(3):e72. PMID: 23538392. doi: 10.2196/jmir.2442.
  42. Kristjansdottir OB, Fors EA, Eide E, Finset A, Stensrud TL, van Dulmen S, et al. A smartphone-based intervention with diaries and therapist-feedback to reduce catastrophizing and increase functioning in women with chronic widespread pain: randomized controlled trial. *J Med Internet Res.* 2013 Jan 07;15(1):e5. PMID: 23291270. doi: 10.2196/jmir.2249.
  43. Kristjansdottir OB, Fors EA, Eide E, Finset A, van Dulmen S, Wigers SH, et al. Written online situational feedback via mobile phone to support self-management of chronic widespread pain: a usability study of a Web-based intervention. *BMC Musculoskelet Disord.* 2011 Feb 25;12:51. PMID: 21352516. doi: 10.1186/1471-2474-12-51.
  44. Jelin E, Granum V, Eide H. Experiences of a web-based nursing intervention--interviews with women with chronic musculoskeletal pain. *Pain Manag Nurs.* 2012 Mar;13(1):2-10. PMID: 22341135. doi: 10.1016/j.pmn.2011.08.008.
  45. McMahan GT, Gomes HE, Hickson Hohne S, Hu TM, Levine BA, Conlin PR. Web-based care management in patients with poorly controlled diabetes. *Diabetes Care.* 2005 Jul;28(7):1624-9. PMID: 15983311.
  46. Fonda SJ, McMahan GT, Gomes HE, Hickson S, Conlin PR. Changes in diabetes distress related to participation in an internet-based diabetes care management program and glycemic control. *J Diabetes Sci Technol.* 2009 Jan;3(1):117-24. PMID: 20046656. doi: 10.1177/193229680900300113.
  47. Homko CJ, Santamore WP, Whiteman V, Bower M, Berger P, Geifman-Holtzman O, et al. Use of an internet-based telemedicine system to manage underserved women with gestational diabetes mellitus. *Diabetes Technol Ther.* 2007 Jun;9(3):297-306. PMID: 17561800. doi: 10.1089/dia.2006.0034.
  48. Ralston JD, Hirsch IB, Hoath J, Mullen M, Cheadle A, Goldberg HI. Web-based collaborative care for type 2 diabetes: a pilot randomized trial. *Diabetes Care.* 2009 Feb;32(2):234-9. PMID: 19017773. doi: 10.2337/dc08-1220.
  49. Tang PC, Overhage JM, Chan AS, Brown NL, Aghighi B, Entwistle MP, et al. Online disease management of diabetes: engaging and motivating patients online with enhanced resources-diabetes (EMPOWER-D), a randomized controlled trial. *J Am Med Inform Assoc.* 2013 May 01;20(3):526-34. PMID: 23171659. doi: 10.1136/amiajnl-2012-001263.
  50. Zutz A, Ignaszewski A, Bates J, Lear SA. Utilization of the internet to deliver cardiac rehabilitation at a distance: a pilot study. *Telemed J E Health.* 2007 Jun;13(3):323-30. PMID: 17603835. doi: 10.1089/tmj.2006.0051.
  51. Quinn CC, Shardell MD, Terrin ML, Barr EA, Ballew SH, Gruber-Baldini AL. Cluster-randomized trial of a mobile phone personalized behavioral intervention for blood glucose control. *Diabetes Care.* 2011 Sep;34(9):1934-42. PMID: 21788632.
  52. Liebreich T, Plotnikoff RC, Courneya KS, Boule N. Diabetes NetPLAY: A physical activity website and linked email counselling randomized intervention for individuals with type 2 diabetes. *Int J Behav Nutr Phys Act.* 2009 Mar 27;6:18. PMID: 19327141. doi: 10.1186/1479-5868-6-18.

53. Bergmo TS, Wangberg SC, Schopf TR, Solvoll T. Web-based consultations for parents of children with atopic dermatitis: results of a randomized controlled trial. *Acta Paediatr.* 2009 Feb;98(2):316-20. PMID: 18795905. doi: 10.1111/j.1651-2227.2008.01033.x.
54. Meglic M, Furlan M, Kuzmanic M, Kozel D, Baraga D, Kuhar I, et al. Feasibility of an eHealth service to support collaborative depression care: results of a pilot study. *J Med Internet Res.* 2010 Dec 19;12(5):e63. PMID: 21172765. doi: 10.2196/jmir.1510.
